# Supplementary material
Source: Royal Society of Chemistry journal article supplement (doi:10.1039/d6ta02614a)
Supplement: d6ta02614a1.pdf [file d6ta02614a1.pdf]

# Realizing Outstanding Energy Storage Performance in BNST- based lead-free ceramics via introducing pyrochlore phase $\text{La}_2\text{Zr}_2\text{O}_7$

Hanao Deng <sup>a,†</sup>, Wenyuan Li <sup>a,b,†</sup>, Jianan Xu <sup>a,b</sup>, Xuemei Jia <sup>a,b</sup>, Hao Sun <sup>a,b</sup>, Yafei Liu <sup>a</sup>, Ruifeng Wu <sup>a</sup>, Aimin

Chang <sup>a</sup>, Bo Zhang <sup>a,\*</sup>

<sup>a</sup>CAS Key Laboratory of Functional Materials and Devices for Special Environmental Conditions; Xinjiang Key

Laboratory of Electronic Information Materials and Devices; Xinjiang Technical Institute of Physics & Chemistry

of CAS, Urumqi, 830011, China.

<sup>b</sup>Center of Materials Science and Optoelectronics Engineering, University of Chinese Academy of Sciences,

Beijing, 100049, China.

<sup>†</sup>These authors contributed equally to this work.

\*Corresponding author.

E-mail address: zhangbocas@ms.xjb.ac.cn

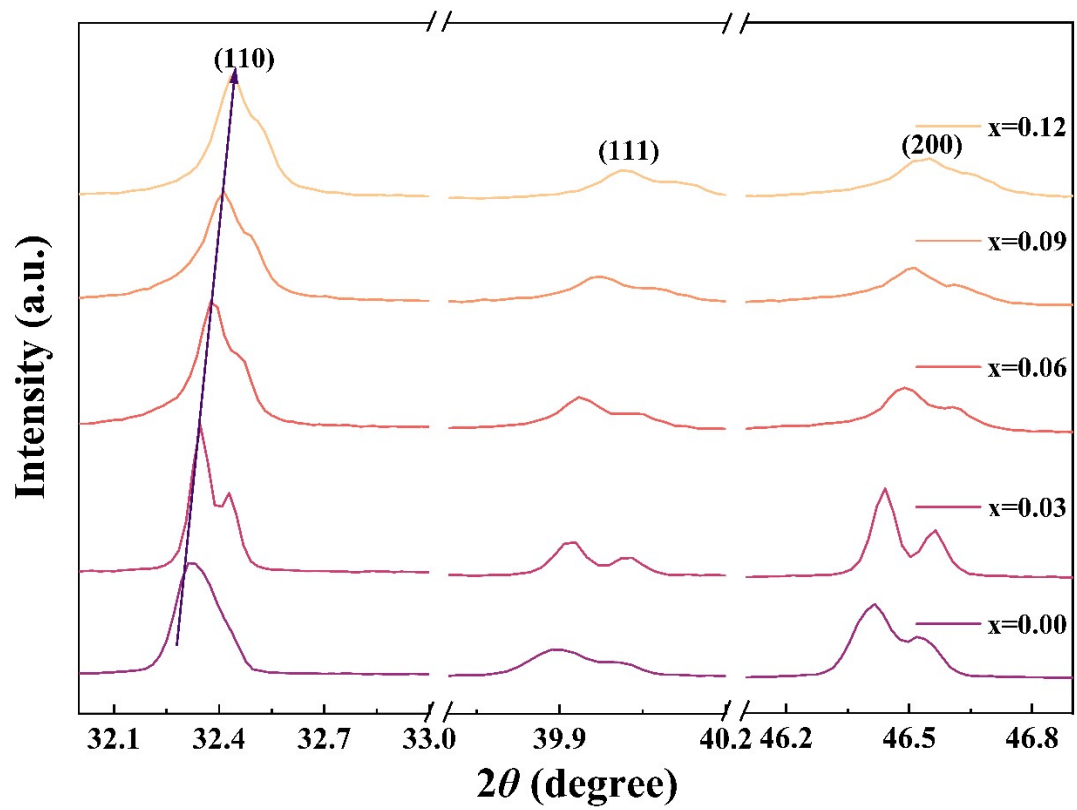

Fig.S1 XRD patterns of the enlarged patterns of 32-47°.

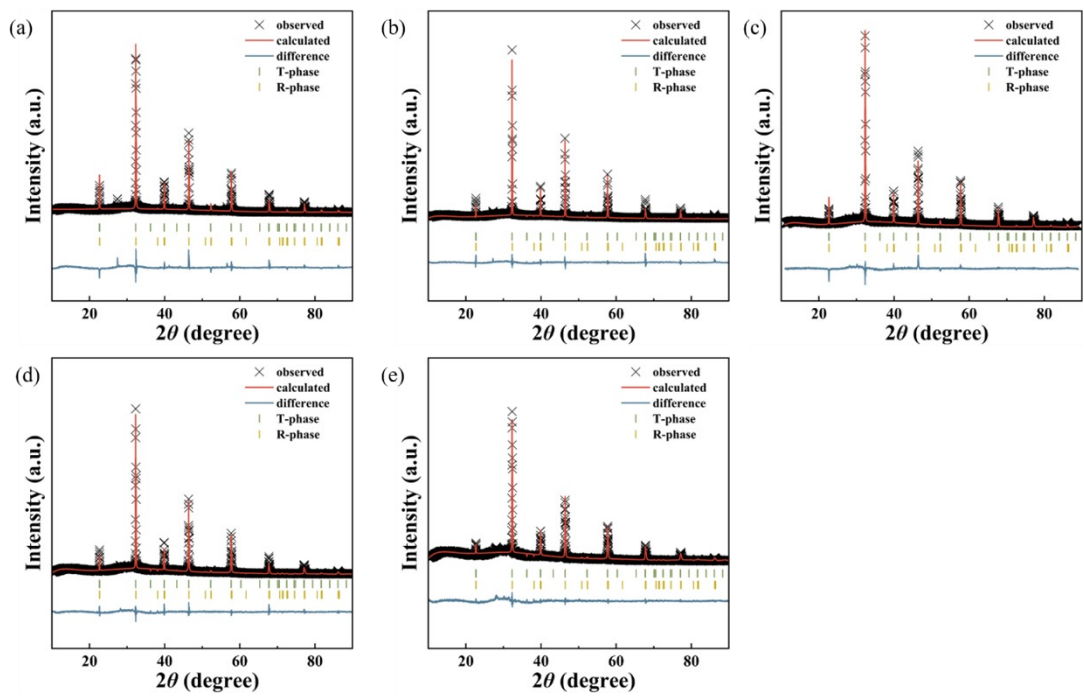

**Fig.S2** Rietveld refinement analysis of BNST-xLZO ceramics.

**Table.S1** The information of all ceramics of Rietveld refinement

|                 |           | $x = 0$          | $x = 0.03$ | $x = 0.06$ | $x = 0.09$ | $x = 0.12$ |
|-----------------|-----------|------------------|------------|------------|------------|------------|
| Crystal system  |           | $R+T$            | $R+T$      | $R+T$      | $R+T$      | $R+T$      |
| Space group     |           | $R3c+P4b$<br>$m$ | $R3c+P4bm$ | $R3c+P4bm$ | $R3c+P4bm$ | $R3c+P4bm$ |
| $R$             | $a/b$ (Å) | 5.513            | 5.512      | 5.516      | 5.514      | 5.515      |
|                 | $c$ (Å)   | 13.518           | 13.498     | 13.588     | 13.520     | 13.510     |
| $T$             | $a/b$ (Å) | 5.507            | 5.511      | 5.522      | 5.516      | 5.516      |
|                 | $c$ (Å)   | 3.897            | 3.888      | 3.909      | 3.903      | 3.901      |
| $R$ -<br>factor | $R_{wp}$  | 9.329            | 9.165      | 9.966      | 9.26       | 9.824      |
|                 | $R_p$     | 7.41             | 4.60       | 3.83       | 5.32       | 4.32       |

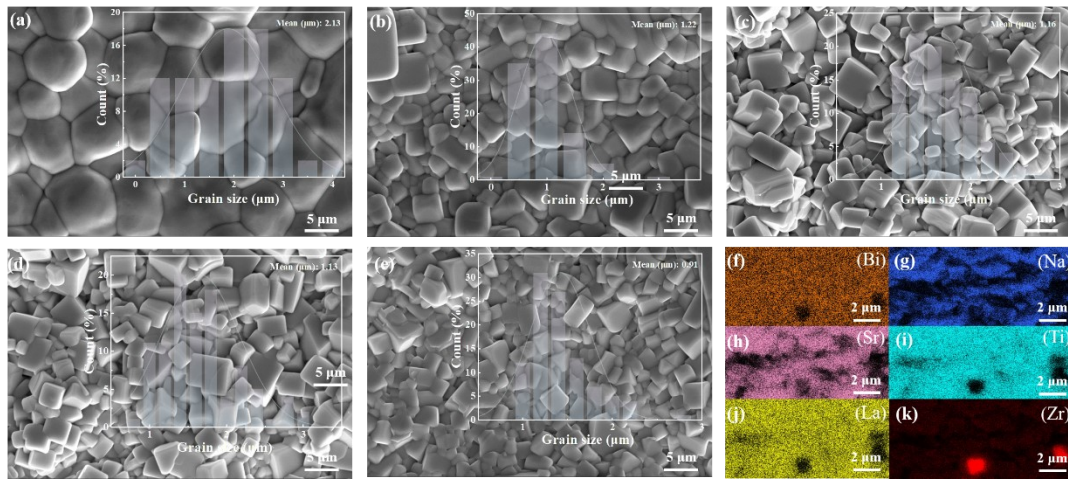

**Fig.S3** SEM images of BNST- $x$ LZO ceramics: (a)  $x = 0$ ; (b)  $x = 0.03$ ; (c)  $x = 0.06$ ; (d)  $x = 0.09$ ; (e)  $x = 0.12$ ; (f)-(k) EDS images of BNST- $x$ LZO ceramics.

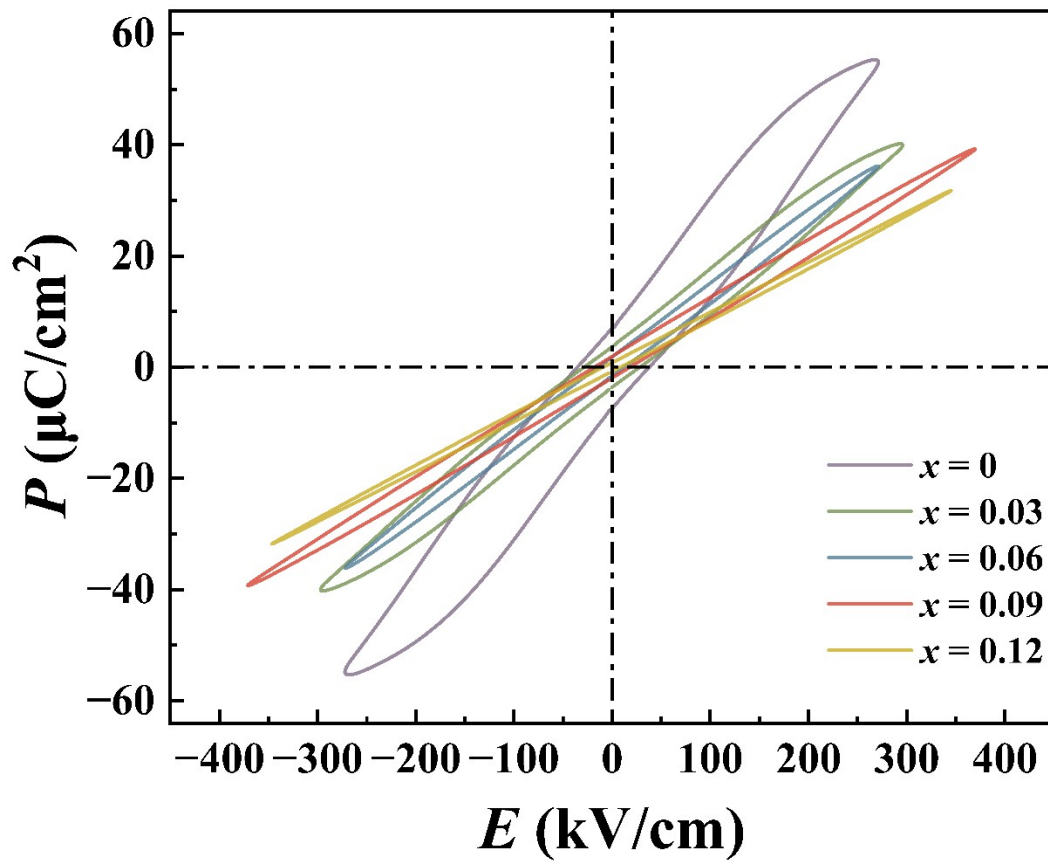

**Fig.S4** The  $P$ - $E$  hysteresis loops of BNST- $x$ LZO ceramics under different electric field.

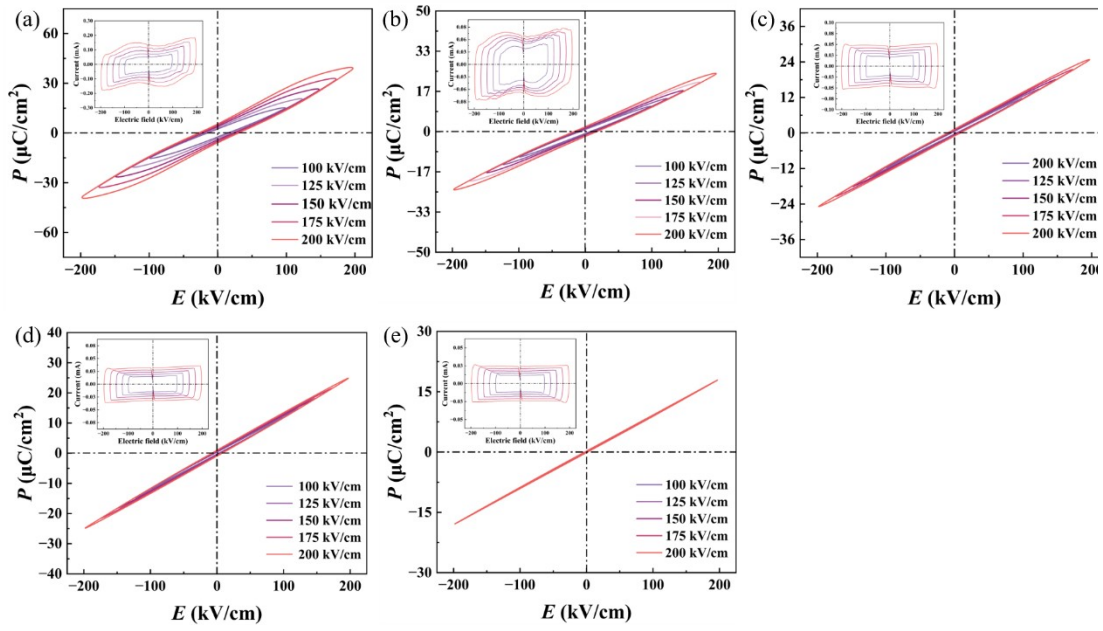

**Fig.S5** The  $P$ - $E$  loops and corresponding  $I$ - $E$  loops of BNST- $x$ LZO ceramics: (a)  $x = 0$ ; (b)  $x = 0.03$ ; (c)  $x = 0.06$ ; (d)  $x = 0.09$ ; (e)  $x = 0.12$ .

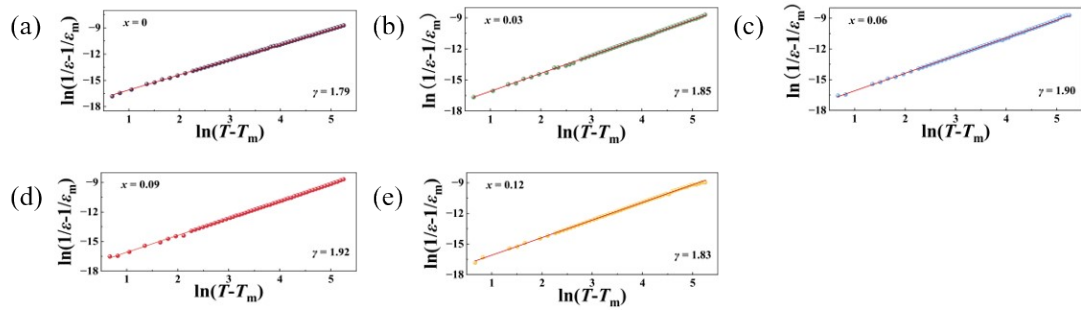

**Fig.S6** Temperature dependence of diffuseness parameter  $\gamma$  for BNST-xLZO ceramics: (a)  $x = 0$ ; (b)  $x = 0.03$ ; (c)  $x = 0.06$ ; (d)  $x = 0.09$ ; (e)  $x = 0.12$ .

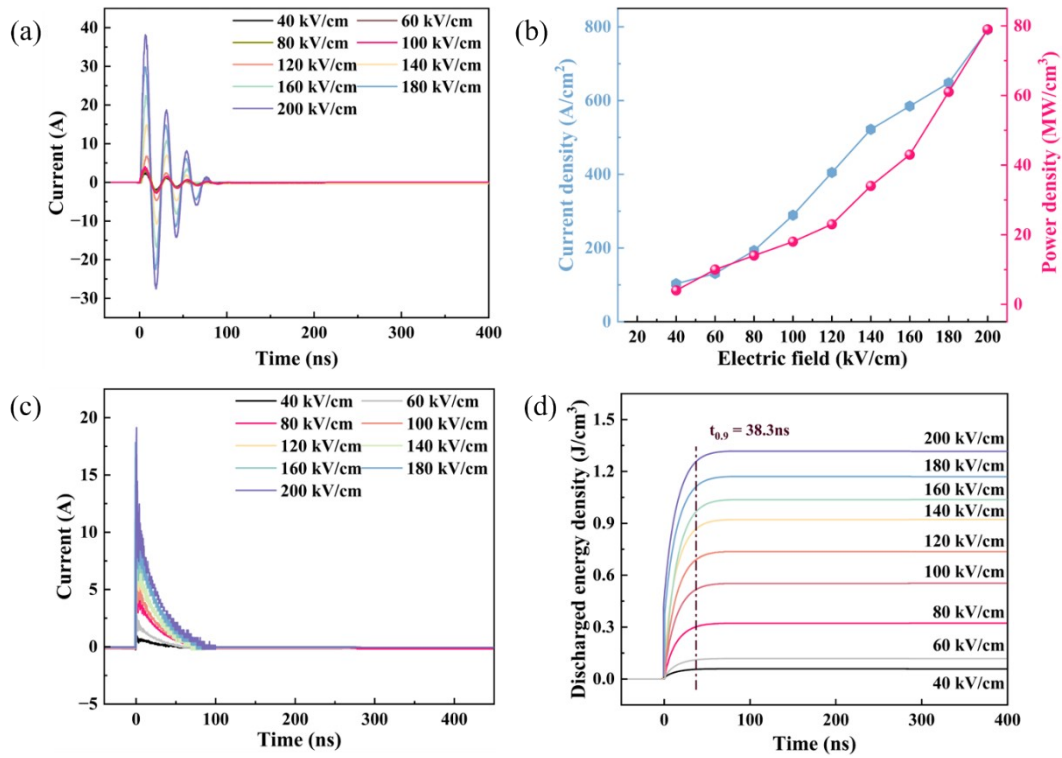

**Fig.S7** (a) The underdamped discharge performance and (b)  $C_D$  and  $P_D$  for BNST-0.09LZO ceramic under different electric fields; (c) The overdamped discharge curves and (d) Time-dependent discharge energy density for BNST-0.09LZO ceramic under various electric fields with a fixed load resistance.
